# Supplementary material
Source: PubMed Central journal article supplement (PMC6296855)
Supplement: NIHMS983847-supplement-sup_tables.pdf [file NIHMS983847-supplement-sup_tables.pdf]

**Table 1. Phenotype and viability of *Tyr* edited zygotes and mice by CRISPR-EZ**

| Strain | Genome Editing Method | Zygotes Electroporated | Zygotes Recovered After Electroporation | Zygotes Transferred <sup>a</sup> | Mice Born | Viability | Genotyping <sup>b</sup> |            |           |
|--------|-----------------------|------------------------|-----------------------------------------|----------------------------------|-----------|-----------|-------------------------|------------|-----------|
|        |                       |                        |                                         |                                  |           |           | No Mutation             | HDR        | Indel     |
| B6N    | 2 pulses              | 30                     | 30                                      | 10                               | 5         | 50        | 0                       | 0          | 5 (100%)  |
| B6N    | 6 pulses              | 40                     | 22                                      | 22                               | 6         | 27.2727   | 0                       | 1 (17%)    | 6 (100%)  |
| B6J    | 4 pulses              | 35                     | 29                                      | 29                               | 15        | 51.7241   | 5 (33%)                 | 1 (7%)     | 10 (67%)  |
| B6J    | 6 pulses              | 35                     | 34                                      | 34                               | 16        | 47.0588   | 0                       | 10 (62.5%) | 16 (100%) |
| B6J    | 8 pulses              | 35                     | 30                                      | 29                               | 12        | 41.3793   | 0                       | 6 (50%)    | 12 (100%) |
| B6J    | 4 pulses              | 100 <sup>c</sup>       | 80                                      | 48                               | 26        | 54.1667   | 3 (12%)                 | 14 (62%)   | 23 (88%)  |

a) Number of Zygotes transferred to pseudopregnant females after electroporation.

b) HDR and an Indel events are not mutually exclusive.

c) 100 Zygotes were electroporated in a single cuvette

Table 2. Results of CRISPR-EZ and Microinjection Deletion Experiments.

| Gene <sup>a</sup> | Method         | Date of Electroporation or Microinjection | Number of sgRNAs Delivered | Zygotes Injected <sup>b</sup> or Loaded into Single Cuvette <sup>c</sup> | Zygotes Recovered <sup>d</sup> | Zygotes Transferred <sup>e</sup> | Pups Born | Viability (%) | Edited Pups <sup>f</sup> | Edited Pups (%) |
|-------------------|----------------|-------------------------------------------|----------------------------|--------------------------------------------------------------------------|--------------------------------|----------------------------------|-----------|---------------|--------------------------|-----------------|
| Cfap57            | CRISPR-EZ      | 3/22/17                                   | 4                          | 50                                                                       | 49                             | 40                               | 4         | 10.0          | 4                        | 100.0           |
| Clcnkb            | CRISPR-EZ      | 1/18/17                                   | 4                          | 60                                                                       | 58                             | 40                               | 14        | 35.0          | 8                        | 57.1            |
| Cndp2             | CRISPR-EZ      | 1/23/17                                   | 4                          | 62                                                                       | 50                             | 40                               | 6         | 15.0          | 4                        | 66.7            |
| Ddx6              | CRISPR-EZ      | 12/14/16                                  | 4                          | 70                                                                       | 64                             | 40                               | 20        | 50.0          | 5                        | 25.0            |
| Fubp1             | CRISPR-EZ      | 1/23/17                                   | 4                          | 60                                                                       | 48                             | 35                               | 6         | 17.1          | 3                        | 50.0            |
| Gsg1l             | CRISPR-EZ      | 12/5/16                                   | 4                          | 70                                                                       | 45                             | 44                               | 7         | 15.9          | 3                        | 42.9            |
| Sfmbt2            | CRISPR-EZ      | 12/5/16                                   | 4                          | 70                                                                       | 55                             | 44                               | 29        | 65.9          | 3                        | 10.3            |
| Sh3rf2            | CRISPR-EZ      | 1/11/17                                   | 2                          | 60                                                                       | 51                             | 40                               | 17        | 42.5          | 4                        | 23.5            |
| Tuba1a            | CRISPR-EZ      | 1/11/17                                   | 4                          | 60                                                                       | 52                             | 40                               | 14        | 35.0          | 0                        | 0.0             |
| Unc5cl            | CRISPR-EZ      | 9/28/16                                   | 4                          | 60                                                                       | 49                             | 40                               | 8         | 20.0          | 6                        | 75.0            |
| Copb1             | CRISPR-EZ      | 9/28/16                                   | 4                          | 43                                                                       | 41                             | 30                               | 6         | 20.0          | 1                        | 16.7            |
| Kpna2             | CRISPR-EZ      | 9/29/16                                   | 4                          | 89                                                                       | 62                             | 40                               | 11        | 27.5          | 2                        | 18.2            |
| Ocel1             | CRISPR-EZ      | 10/7/16                                   | 4                          | 45                                                                       | 35                             | 36                               | 24        | 66.7          | 0                        | 0.0             |
| Slc25a18          | CRISPR-EZ      | 10/7/16                                   | 4                          | 44                                                                       | 33                             | 33                               | 16        | 48.5          | 1                        | 6.3             |
| Ipo7              | CRISPR-EZ      | 10/7/16                                   | 4                          | 50                                                                       | 36                             | 36                               | 13        | 36.1          | 8                        | 61.5            |
| Xpo5              | CRISPR-EZ      | 10/10/16                                  | 4                          | 56                                                                       | 50                             | 40                               | 12        | 30.0          | 8                        | 66.7            |
| Mcts1             | CRISPR-EZ      | 10/10/16                                  | 4                          | 53                                                                       | 50                             | 40                               | 12        | 30.0          | 3                        | 25.0            |
| Wdr82             | CRISPR-EZ      | 10/11/16                                  | 4                          | 66                                                                       | 52                             | 40                               | 11        | 27.5          | 1                        | 9.1             |
| Cyp4v3            | CRISPR-EZ      | 10/11/16                                  | 4                          | 63                                                                       | 41                             | 40                               | 8         | 20.0          | 6                        | 75.0            |
| Cdhr2             | CRISPR-EZ      | 12/14/16                                  | 4                          | 72                                                                       | 65                             | 40                               | 8         | 20.0          | 0                        | 0.0             |
| Eif3i             | CRISPR-EZ      | 12/14/16                                  | 4                          | 72                                                                       | 63                             | 40                               | 3         | 7.5           | 0                        | 0.0             |
| Cfap57            | Microinjection | 1/5/17                                    | 4                          | 50                                                                       | 36                             | 36                               | 6         | 16.7          | 0                        | 0.0             |
| Clcnkb            | Microinjection | 8/15/16                                   | 3                          | 65                                                                       | 50                             | 50*                              | 9         | 18.0          | 0                        | 0.0             |
| Cndp2             | Microinjection | 8/22/16                                   | 4                          | 48                                                                       | 36                             | 34                               | 3         | 8.8           | 0                        | 0.0             |
| Ddx6              | Microinjection | 7/11/16                                   | 4                          | 50                                                                       | 37                             | 37                               | 6         | 16.2          | 0                        | 0.0             |
| Fubp1             | Microinjection | 8/22/16                                   | 4                          | 42                                                                       | 35                             | 34                               | 4         | 11.8          | 0                        | 0.0             |
| Gsg1l             | Microinjection | 10/17/16                                  | 4                          | 65                                                                       | 40                             | 40                               | 22        | 55.0          | 0                        | 0.0             |
| Sfmbt2            | Microinjection | 10/24/16                                  | 4                          | 45                                                                       | 35                             | 35                               | 9         | 25.7          | 0                        | 0.0             |
| Sh3rf2            | Microinjection | 5/16/16                                   | 4                          | 55                                                                       | 40                             | 40                               | 29        | 72.5          | 1                        | 3.4             |
| Tuba1a            | Microinjection | 4/18/16                                   | 4                          | 76                                                                       | 60                             | 60*                              | 5         | 8.3           | 1                        | 20.0            |
| Cand1             | Microinjection | 10/12/16                                  | 4                          | 58                                                                       | 40                             | 40                               | 9         | 22.5          | 1                        | 11.1            |
| Slc22a16          | Microinjection | 10/12/16                                  | 4                          | 63                                                                       | 51                             | 40                               | 21        | 52.5          | 0                        | 0.0             |
| Ubac2             | Microinjection | 10/17/16                                  | 4                          | 70                                                                       | 40                             | 40                               | 13        | 32.5          | 0                        | 0.0             |
| Map3k13           | Microinjection | 10/18/16                                  | 4                          | 50                                                                       | 35                             | 35                               | 18        | 51.4          | 5                        | 27.8            |
| Sliitrk2          | Microinjection | 10/18/16                                  | 4                          | 50                                                                       | 40                             | 40                               | 18        | 45.0          | 1                        | 5.6             |
| Csmc3             | Microinjection | 10/19/16                                  | 4                          | 100                                                                      | 92                             | 80**                             | 22        | 27.5          | 4                        | 18.2            |
| Fam132a           | Microinjection | 10/19/16                                  | 4                          | 40                                                                       | 35                             | 35                               | 11        | 31.4          | 0                        | 0.0             |
| Maged2            | Microinjection | 10/19/16                                  | 4                          | 35                                                                       | 30                             | 30                               | 8         | 26.7          | 0                        | 0.0             |
| Marveld3          | Microinjection | 10/20/16                                  | 4                          | 59                                                                       | 48                             | 40                               | 14        | 35.0          | 0                        | 0.0             |
| Naa10             | Microinjection | 10/20/16                                  | 4                          | 58                                                                       | 50                             | 40                               | 10        | 25.0          | 1                        | 10.0            |
| Serhl             | Microinjection | 10/20/16                                  | 4                          | 49                                                                       | 40                             | 40                               | 8         | 20.0          | 0                        | 0.0             |
| Tlk2              | Microinjection | 10/24/16                                  | 4                          | 70                                                                       | 41                             | 40                               | 13        | 32.5          | 1                        | 7.7             |
| Cdc42ep3          | Microinjection | 10/25/16                                  | 4                          | 55                                                                       | 45                             | 40                               | 17        | 42.5          | 4                        | 23.5            |
| Magohb            | Microinjection | 10/25/16                                  | 4                          | 70                                                                       | 44                             | 40                               | 10        | 25.0          | 0                        | 0.0             |
| 1700034E13Rik     | Microinjection | 12/8/16                                   | 4                          | 60                                                                       | 42                             | 40                               | 14        | 35.0          | 3                        | 21.4            |
| 2810474O19Rik     | Microinjection | 12/8/16                                   | 4                          | 90                                                                       | 56                             | 55*                              | 11        | 20.0          | 3                        | 27.3            |
| 4833420G17Rik     | Microinjection | 12/9/16                                   | 4                          | 50                                                                       | 45                             | 40                               | 12        | 30.0          | 1                        | 8.3             |
| 8030462N17Rik     | Microinjection | 12/9/16                                   | 4                          | 80                                                                       | 68                             | 60*                              | 5         | 8.3           | 0                        | 0.0             |

a) Gene names highlighted in grey were involved in direct comparisons between CRISPR-EZ and Microinjection.

b) All zygotes from each electroporation experiment were loaded into the same cuvette. Conditions across all procedures were 8uM Cas9 Protein, 6 pulses at 30V with 3ms pulse intervals.

c) All zygotes from each experiment were individually injected with a cocktail of up to 4 sgRNAs and injection buffer. 100ng/μL Cas9, 20ng/μL Each sgRNA.

d) Zygote recovery and survival was based on visual cues. Those that appeared lysed were discarded.

e) For the majority of experiments, embryos were transferred to two recipient females each, with approximately 20 embryos per female.

\*) Instead of 2 recipient females, 3 were used.

\*\*) Instead of 2 recipient females, 4 were used.

f) "Edited" is defined by presence of desired PCR amplicon. Animals may be Heterozygous or Mosaic.

Table 3. Sequences and expected editing results of sgRNAs used in Electroporation Experiments.

| Gene <sup>a</sup>   | Fwd Primer                   | Rev Primer                  | 5'gRNA-1              | 5'gRNA-2              | 3'gRNA-1             | 3'gRNA-2              | Targeted exon for deletion | Unedited amplicon Size (bp) | Predicted deletion size (bp) <sup>b</sup> |
|---------------------|------------------------------|-----------------------------|-----------------------|-----------------------|----------------------|-----------------------|----------------------------|-----------------------------|-------------------------------------------|
| Unc5cl              | cttcagacagcaggttaggtacc      | cacctcaagaacctcaattgag      | gggtcatcgctactcgtttg  | aggccaccgagagctaaactg | agcatgctaaatgaatgaag | agaacagtggtcctcagagag | 3                          | 1214                        | 580-684                                   |
| Copb1               | ccagctccctctagaattttg        | ctgaatccatgctcacactctagg    | tggaaltccaactgttcaga  | ggcagctlagcccccgtcc   | gaacttagacgacacaccac | gtagaaaagggttggggatg  | 3,4                        | 3323                        | 2,508-2,672                               |
| Kpna2               | ctgacttgagaatccaatgtcatgg    | gctgtttctctagaaaagcaatttc   | tgactgtgaaaacagtgtag  | ggtcagacaactcataatg   | ggatgttttaaaggggaa   | tgtcacttaaaagcagcct   | 4                          | 1127                        | 697-780                                   |
| Oce1                | ctctgggacaggtgacaccgag       | gtgagatccatgctattgagcc      | cgcgcgctcatgctcagagag | gatccgcaactctgggtgctg | fgcttggggcctgctcag   | gctcaggttagtttcaactg  | 1,2,3,4                    | 2203                        | 1,714-1,837                               |
| Slc25a18            | gttctcgaggcatctttgaagg       | gtcatcatgtgggctgagctc       | agagaggttctclagcctgtg | gctctcagggaggggtgctg  | tgctacaggtcacaagaatg | tggaagaatlaattcctcgg  | 3,4                        | 945                         | 510-592                                   |
| Ipo7                | gttgatccccctggatttag         | gatgctcagcagtaagacc         | agaggatcacaacctcttc   | gtagggatcaaaactagagc  | agccctactccaataatca  | gtgcatgtgtgtccattg    | 2                          | 940                         | 395-627                                   |
| Xpo5                | gggttgacattcaactgtatggg      | cagcacagaaacctttaatcttc     | agccctggagatgqcatag   | gctgaggactggaatccagg  | gcacctgtgtgctcatgaa  | gcacaggtgctgctaact    | 2                          | 1569                        | 547-1,164                                 |
| Mcts1               | gcagtgtatctccattcctagattc    | ctccttgggtgtgttgaatgac      | agcttagcaataggcctgac  | gtaaggaagaccaattcct   | gccaccactcatgcttta   | agtttggattgttccaag    | 2,3                        | 2551                        | 1,427-2,239                               |
| Wdr82               | cctctgttgattctgtttgtg        | ccaaccctgcttttagaag         | caaccacataatgacttagc  | gggggagaggatctcgaggg  | tgcaaatcaaacacaacg   | gctggaggagtgaggtagc   | 2                          | 1172                        | 659-871                                   |
| Cyp4v3              | gcatgtagcagacattttactgac     | gaagacattgcacaacagcttc      | gaatcaacgcccaacacat   | gggtgtgagctcagagg     | tgcaacaataaacaccgag  | ggctatatgcatgtctgtt   | 2                          | 934                         | 406-623                                   |
| Cdhr2               | cagggacaagcctttcaaacgc       | agcagaaccgtgggttcctgg       | gactcttgcctcagctgtg   | tgctcgaaggaaacatggg   | gcalgtatgccctacactg  | gtgggactaatgactgatg   | 4,5                        | 1191                        | 1,030-1,133                               |
| Eif3i               | ccatgtgtgtttgtatgtgtgtgc     | ctggcctgaaactcagaaaacc      | cgggagggcatgagctgtag  | agcctcattagcaggactcg  | agtggtcctgtcacaagaag | agaagtgagtagactctccg  | 5,6                        | 1272                        | 722-811                                   |
| Cfap57              | ccaataaaccagccctggg          | tgtaaggtttgtgcttgatgc       | atagacagggccaccatacac | agtatagctctactacatg   | ctcctgaagcctccaccg   | catctcctggaatgctgtg   | 4                          | 1198                        | 656-846                                   |
| Clnkb               | gacaggttttctgggctggag        | gctgggaagctggaccctacc       | gccaagctacaagacatcc   | gaaataagccggccggtgg   | none                 | gacagtgaggggtaggaca   | 5                          | 943                         | 435-548                                   |
| Cndp2               | gctctgaaggaaagagatgaccc      | aatagacataaccagttctgtagg    | gctgtccctacaagaactg   | gtggttgagatgttaccct   | gggatattactgtgaccg   | ggaagctgcaagcctcagg   | 4                          | 1516                        | 955-1051                                  |
| Ddx6                | attatcgtgctgctcattggg        | caactattcaatacacagagcctcagc | gctaagaactacagatactct | gttactglaagttacagcct  | tgaaatgacgctgcatgtgt | gtgctacaggtgtagcat    | 3                          | 1657                        | 932-1099                                  |
| Fubp1               | gcatgtgagaagttaggattagactagc | aaagggccacaatacagtcagtc     | gttacgtacaattgaacgag  | tggtgggtgttttaaatg    | gtgattctgactgaatgaa  | ggtaaggttgggtgtgct    | 2                          | 1343                        | 635-823                                   |
| Gsg1l               | cagggacaagccttcaaacgc        | agcagaaccgtgggttctgg        | gtctctctgcttgaagtg    | tgccctctccactcccgcg   | gctgcgagttccagtgctg  | gaaatgactcaggccgaag   | 1                          | 1191                        | 799-885                                   |
| Sfmbt2              | gaactcattgctcgcagagcagc      | ctlaaggaggctgagttgctgc      | gacatttccagctaaagtg   | gaaagctgcataaaagggg   | gagccacaataagagtttgt | tgtggctggggtaaatctt   | 4                          | 1782                        | 1039-1436                                 |
| Sh3rf2 <sup>c</sup> | gtlgagggagcctaagttctgagtc    | caggttgacatgctagtagtcc      | agtagtgcaggctgcaacg   | tggtttgggtagagtgagg   | ggctgggcatggagactagg | gatctctattgtctcactc   | 5                          | 836                         | 383(EZ) ,292-532                          |
| Tuba1a              | caagtgccatgatgaaataccaggtc   | gtaacctgtcaactcacaatgtgc    | gcagtattaaggtgacatct  | ggagtcacatcctaataac   | gtgtgccagcttctatgctt | tggaaggttgggtcccag    | 2,3,4                      | 2623                        | 2037-2286                                 |

a) Gene names highlighted in grey were involved in direct comparisons between CRISPR-EZ and Microinjection.

b) For each deletion, up to 4 sgRNAs were combined during the electroporation. Two were designed upstream of the targeted exon and two were designed downstream. Shortest and Longest predicted deletion sizes are noted.

c) Electroporation was performed with 5'gRNA-1 and 3'gRNA-1. Microinjection was performed with all four sgRNA.
